# Supplementary material for: Laparoscopic Gastric Plication versus Laparoscopic Sleeve Gastrectomy: An Up-to-Date Systematic Review and Meta-Analysis
Source: J Obes. 2018 Oct 9;2018:3617458. doi: 10.1155/2018/3617458 (PMC6198571; doi:10.1155/2018/3617458)
Supplement: Supplementary Materials — Figure 3.1: BMI at 3 months; Figure 3.2: BMI at 6 and 12 months; Figure 4.1: BMIL; Figure 5.1: LOS; Figure 6.1: operation duration; Figure 7.1: reoperation; Figure 8.1: cost; Figure 9.1: comorbidities improvement; Figure 10: funnel plot; Figure 11: sensitivity analysis. [file 3617458.f1.zip]

Archive with 10 entries (10 files):
- 3617458.f1/Supplementary_Figure 10_JOBE_2472236.eps
- 3617458.f1/Supplementary_Figure 11_JOBE_2472237.eps
- 3617458.f1/Supplementary_Figure 3.1_JOBE_2472228.eps
- 3617458.f1/Supplementary_Figure 3.2_JOBE_2472229.eps
- 3617458.f1/Supplementary_Figure 4.1_JOBE_2472230.eps
- 3617458.f1/Supplementary_Figure 5.1_JOBE_2472231.eps
- 3617458.f1/Supplementary_Figure 6.1_JOBE_2472232.eps
- 3617458.f1/Supplementary_Figure 7.1_JOBE_2472233.eps
- 3617458.f1/Supplementary_Figure 8.1_JOBE_2472234.eps
- 3617458.f1/Supplementary_Figure 9.1_JOBE_2472235.eps
